# Supplementary material for: Hierarchical nanostructures of K-birnessite nanoplates on anatase nanofibers and their application for decoloration of dye solution
Source: Royal Society of Chemistry journal article supplement (doi:10.1039/c000446d), 2010-01-01
Supplement: c000446d.pdf [file c000446d.pdf]

## Supporting Information for Hierarchical Nanostructures of K-Birnessite Nanoplates on Anatase Nanofibers and Their Application for Decoloration of Dye Solution

Yunqian Dai,<sup>1,2,†</sup> Xiaofeng Lu,<sup>1,†</sup> Maureen McKiernan,<sup>3</sup> Eric P. Lee,<sup>1</sup>  
Yueming Sun,<sup>2</sup> and Younan Xia<sup>1,\*</sup>

<sup>1</sup>*Department of Biomedical Engineering, Washington University, St. Louis, MO  
63130, USA* <sup>2</sup>*School of Chemistry and Chemical Engineering, Southeast University,  
Nanjing, Jiangsu 211189, P. R. China*

<sup>3</sup>*Department of Chemistry, Washington University, St. Louis, MO 63130, USA*

<sup>†</sup>These two authors contributed equally to this work.

\* To whom correspondence should be addressed. E-mail: [xia@biomed.wustl.edu](mailto:xia@biomed.wustl.edu)

### Captions of Figures

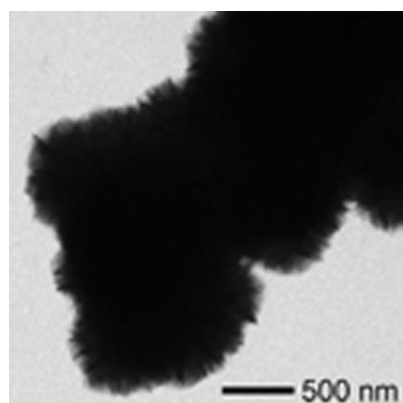

**Figure S1.**  $K_xMnO_2$  synthesized using a procedure similar to that used in the main text except the absence of  $TiO_2$  nanofibers. The  $K_xMnO_2$  exhibited a plate-like morphology too but tended to agglomerate into large structures.

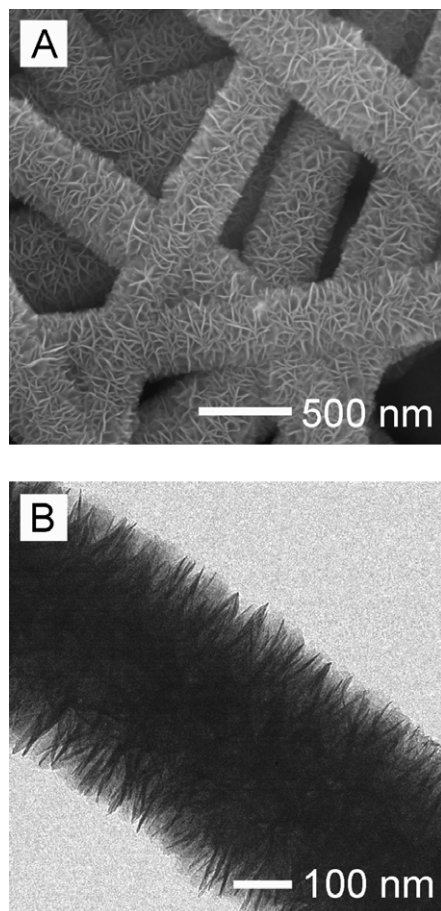

**Figure S2.** (A) SEM and (B) TEM images showing morphologies of the  $K_xMnO_2/TiO_2$  hierarchical nanostructures after passing 80 mL of congo red solution in a continuous flow reactor. Both the density and morphology of the  $K_xMnO_2$  nanoplates were well preserved during the treatment.
